# Supplementary material for: A single full-length VAR2CSA ectodomain variant purifies broadly neutralizing antibodies against placental malaria isolates
Source: eLife. 2022 Feb 1;11:e76264. doi: 10.7554/eLife.76264 (PMC8959597; doi:10.7554/eLife.76264)
Supplement: Figure 2—figure supplement 3—source data 1. [file elife-76264-fig2-figsupp3-data1.xlsx]

## Sheet: Figure 2D
		Reduction
NF54		92.6902	82.2367
FCR3		92.2046	75.9178
MC		68.4227	26.566
M2022170		57.2922	33.6799
M0736		84.0279	71.9181
M2001190		73.1032	55.3663	100	87.9712
