# Supplementary material for: A single full-length VAR2CSA ectodomain variant purifies broadly neutralizing antibodies against placental malaria isolates
Source: eLife. 2022 Feb 1;11:e76264. doi: 10.7554/eLife.76264 (PMC8959597; doi:10.7554/eLife.76264)
Supplement: Figure 2—source data 1. [file elife-76264-fig2-data1.xlsx]

## Sheet: Figure 2A
		NF54	NF54	7G8	7G8	FCR3	FCR3	HB3	HB3	MC	MC	M920	M920	M200101	M200101
Pre_Depletion		3.4815	3.4246	3.1411	3.0523	3.3746	3.2351	2.383	2.4596	2.7021	2.5764	3.3655	3.3139	1.9662	1.8378
Post_Depletion		0.1506	0.1556	0.15	0.1548	0.1734	0.1996	0.1478	0.1596	0.1342	0.1459	0.6069	0.6562	0.2666	0.2684
