# Supplementary material for: A single full-length VAR2CSA ectodomain variant purifies broadly neutralizing antibodies against placental malaria isolates
Source: eLife. 2022 Feb 1;11:e76264. doi: 10.7554/eLife.76264 (PMC8959597; doi:10.7554/eLife.76264)
Supplement: Figure 2—source data 2. [file elife-76264-fig2-data2.xlsx]

## Sheet: Sheet1
		Pre-Depletion				Post-Depletion
NF54		95.4365	94.0741			6.92641	16.8317
WF12/7G8		72.2	55.4			0	10.68
FCR3		29.6784	36.7927			2.59085	8.00386
MC		75.5196	87.7193			25.7732	59.9364
M2022170		90.91	82.22			36.97	57.41
M0736		69.79	67.95			11	19.34
M2001190		87.1	44.29	68.93	67.37	18	29.87	0	8.05
