# Supplementary material for: A single full-length VAR2CSA ectodomain variant purifies broadly neutralizing antibodies against placental malaria isolates
Source: eLife. 2022 Feb 1;11:e76264. doi: 10.7554/eLife.76264 (PMC8959597; doi:10.7554/eLife.76264)
Supplement: Figure 3—source data 1. [file elife-76264-fig3-data1.xlsx]

## Sheet: Figure 3A
		NF54	NF54	7G8	7G8	FCR3	FCR3	HB3	HB3	MC	MC	M920	M920	M200101	M200101
NF54-IgG		2.5435	2.37	2.4567	2.5	2.5183	2.4517	1.5156	1.3258	1.7805	1.795	2.9349	2.9979	1.5958	1.6337
7G8-IgG		0.1023	0.0904	0.6524	0.6856	0.657	0.7248	0.2394	0.2684	0.2412	0.236	0.5239	0.5303	0.2091	0.2366
FCR3-IgG		0.1244	0.1243	0.129	0.119	1.0527	1.0776	0.2791	0.2961	0.5605	0.5568	0.2123	0.1956	0.1256	0.1241
HB3-IgG		0.1756	0.1784	0.1671	0.165	0.1375	0.1528	0.7046	0.6036	0.5125	0.5474	0.5082	0.5248	0.2005	0.1732
MC-IgG		0.1132	0.1031	0.1133	0.1156	0.114	0.1128	0.12	0.1117	0.4223	0.4195	0.2085	0.218	0.1224	0.116
