# Supplementary material for: A single full-length VAR2CSA ectodomain variant purifies broadly neutralizing antibodies against placental malaria isolates
Source: eLife. 2022 Feb 1;11:e76264. doi: 10.7554/eLife.76264 (PMC8959597; doi:10.7554/eLife.76264)
Supplement: Figure 4—source data 1. [file elife-76264-fig4-data1.xlsx]

## Sheet: Figure 4A
		FV2-NF54_IgG	FV2-NF54_IgG	FV2-NF54_IgG	FV2-NF54_IgG
NF54		97.7836	93.1705	99.9252	82.0828
FCR3		155.863	77.0096
MC		115.972	99.6918
M2022170		37.4863	75.192
M0736		99.0562	65.4567
M2001190		113.519	108.439
