# Supplementary material for: A single full-length VAR2CSA ectodomain variant purifies broadly neutralizing antibodies against placental malaria isolates
Source: eLife. 2022 Feb 1;11:e76264. doi: 10.7554/eLife.76264 (PMC8959597; doi:10.7554/eLife.76264)
Supplement: Figure 4—source data 2. [file elife-76264-fig4-data2.xlsx]

## Sheet: Figure 4B
		FV2-7G8_IgG	FV2-7G8_IgG	FV2-7G8_IgG	FV2-7G8_IgG
NF54		20.3738	0	20.6863	27.4923
FCR3		57.1509	64.1085
MC		111.335	42.9451
M2022170		45.1106	66.632
M0736		8.24742	56.9333
M2001190		89.4019	11.9541
