# Supplementary material for: A single full-length VAR2CSA ectodomain variant purifies broadly neutralizing antibodies against placental malaria isolates
Source: eLife. 2022 Feb 1;11:e76264. doi: 10.7554/eLife.76264 (PMC8959597; doi:10.7554/eLife.76264)
Supplement: Figure 4—source data 3. [file elife-76264-fig4-data3.xlsx]

## Sheet: Figure 4C
		FV2-FCR3_IgG	FV2-FCR3_IgG
NF54		0	0
FCR3		35.6047	76.2522
MC		57.2409	61.1336
