# Supplementary material for: A single full-length VAR2CSA ectodomain variant purifies broadly neutralizing antibodies against placental malaria isolates
Source: eLife. 2022 Feb 1;11:e76264. doi: 10.7554/eLife.76264 (PMC8959597; doi:10.7554/eLife.76264)
Supplement: Figure 4—source data 4. [file elife-76264-fig4-data4.xlsx]

## Sheet: Figure 4D
		FV2-HB3_IgG	FV2-HB3_IgG
NF54		0	7.24019
FCR3		37.8969	0
MC		26.0762	61.8914
