# Supplementary material for: A single full-length VAR2CSA ectodomain variant purifies broadly neutralizing antibodies against placental malaria isolates
Source: eLife. 2022 Feb 1;11:e76264. doi: 10.7554/eLife.76264 (PMC8959597; doi:10.7554/eLife.76264)
Supplement: Figure 4—source data 5. [file elife-76264-fig4-data5.xlsx]

## Sheet: Figure 4E
		FV2-MC_IgG	FV2-MC_IgG
NF54		0	0
FCR3		0	0
MC		36.6217	71.4699
