# Supplementary material for: A single full-length VAR2CSA ectodomain variant purifies broadly neutralizing antibodies against placental malaria isolates
Source: eLife. 2022 Feb 1;11:e76264. doi: 10.7554/eLife.76264 (PMC8959597; doi:10.7554/eLife.76264)
Supplement: Figure 5—source data 1. [file elife-76264-fig5-data1.xlsx]

## Sheet: Sheet1
		FV2 NF54		FV2 7G8		FV2 FCR3		FV2 HB3		FV2 M.Camp		FV2 M920		FV2 M0101
Fv2-MCamp IgG		3.3871	3.453	3.3626	3.3436	2.8257	2.8695	2.1701	2.1501	2.9135	3.0377	2.9828	2.9541	3.1042	3.0159
Fv2-FCR3 IgG		1.6075	1.8463	2.0885	2.1148	1.9311	2.0158	0.5146	0.5439	0.1413	0.1315	0.6203	0.6322	1.2124	1.1857
Fv2-NF54 IgG		2.5888	2.8815	0.8123	0.9147	0.173	0.1635	0.1899	0.1832	0.2394	0.2221	1.2714	1.2986	1.0313	1.0339
