# Supplementary material for: A single full-length VAR2CSA ectodomain variant purifies broadly neutralizing antibodies against placental malaria isolates
Source: eLife. 2022 Feb 1;11:e76264. doi: 10.7554/eLife.76264 (PMC8959597; doi:10.7554/eLife.76264)
Supplement: Figure 5—source data 2. [file elife-76264-fig5-data2.xlsx]

## Sheet: Sheet1
		FV2-Mcamp_IgG
NF54		91.39	92.46
FCR3		97.56	90.28
MC		88.34	87.43
