# Supplementary material for: A single full-length VAR2CSA ectodomain variant purifies broadly neutralizing antibodies against placental malaria isolates
Source: eLife. 2022 Feb 1;11:e76264. doi: 10.7554/eLife.76264 (PMC8959597; doi:10.7554/eLife.76264)
Supplement: Figure 5—source data 4. [file elife-76264-fig5-data4.xlsx]

## Sheet: Sheet1
		FV2-NF54_IgG
NF54		55.09	61.43
FCR3		46.6	46.43
MC		13.45	55.01
